# Supplementary material for: Vangl2-dependent regulation of membrane protrusions and directed migration requires a fibronectin extracellular matrix
Source: Oxford University Press journal article supplement (doi:10.1242/dev.165472), 2018-01-01
Supplement: dev165472supp.pdf [file dev165472supp.pdf]

**Fig. S1. Rose diagrams showing large membrane protrusion directionality around the cell circumference.** Diagrams depicting the circular frequency and distribution of ectodermal cell large protrusions are shown for each experimental condition: wild type, *vangl2*<sup>m209/m209</sup> mutant embryos, *glypican4*<sup>m119/m119</sup> mutant embryos, *vangl2* mRNA injected wild-type embryos, *prickle1a* morpholino (MO) injected wild-type embryos, *fn1a/1b* MO injected embryos, and *fn1a/1b* mRNA injected *vangl2*<sup>m209/m209</sup> mutant embryos. The horizontal plane represents 0° and a mediolateral protrusion orientation while the vertical plane represents 90° and an anterior-posterior protrusion orientation. The position of the dorsal embryonic axis is indicated.

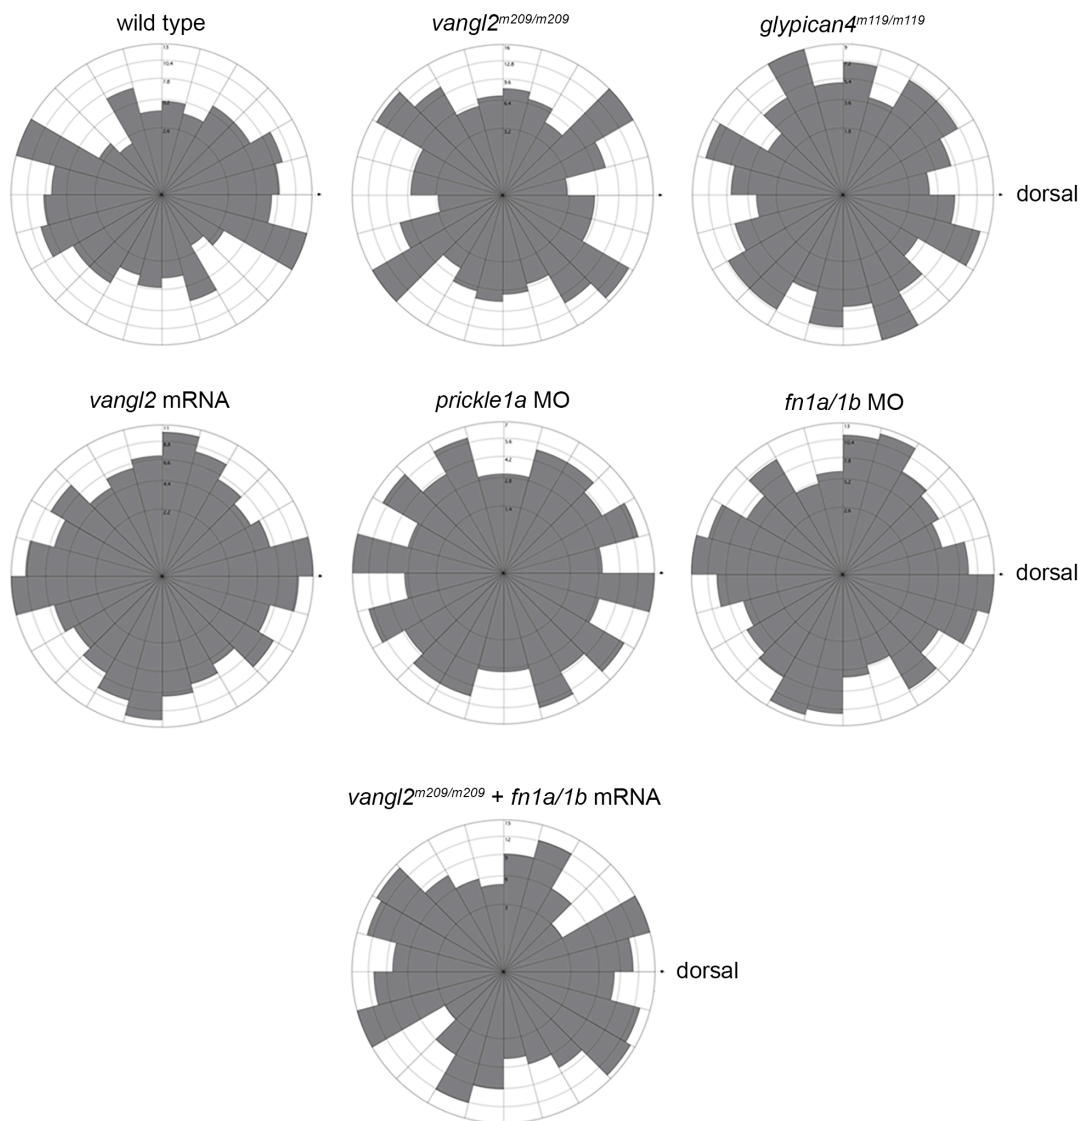

**Fig. S2. Zebrafish Vangl2 polyclonal antibody validation and Vangl2 overexpression.**

(A) Immunofluorescence labeling of endogenous Vangl2 protein expression in wild-type (WT) tailbud stage embryo (right panel, nuclei labeled with DAPI). (B) Vangl2 expression in a wild-type embryo injected with 200 pg synthetic *vangl2* mRNA (right panel, nuclei labeled with DAPI). (C) Endogenous Vangl2 expression in a tailbud stage *vangl2<sup>vu7/vu7</sup>* mutant embryo. Only background fluorescence from the secondary antibody is visible. Scale bars: 5  $\mu$ m in panels A and B; 20  $\mu$ m panel C.

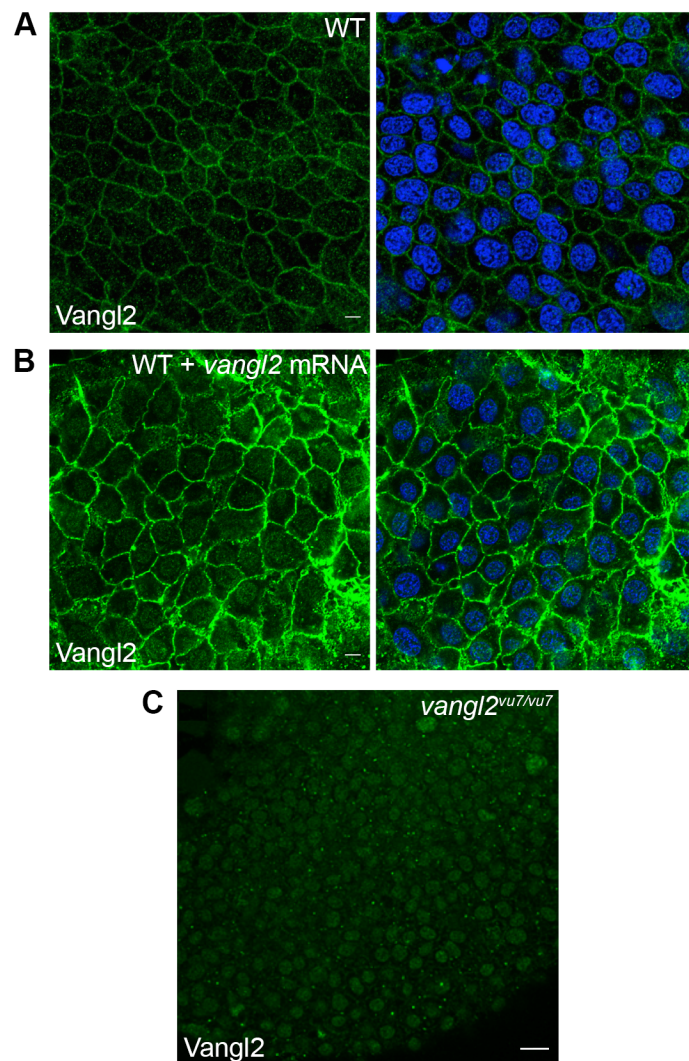

**Fig. S3. Vangl2 overexpression disrupts PCP and membrane protrusion dynamics.** (A) Western blot of Vangl2 protein expression in *vangl2* mRNA-injected wild-type (WT) embryos. Raw unmodified densitometry values are shown. (B) Upper panels, live images of late yolk-plug closure/tailbud stage embryos. Black lines denote the polster-tailbud angle. Lower panels, whole-mount *in situ* hybridizations performed using antisense RNA probes labeling the neural/non-neural ectoderm boundary (*dlx3b*), midline (*shha*), and prechordal mesendoderm (*ctslb*). (C) PCP and migration velocity quantitation in the ectoderm. LWR and MLA values were obtained from: wild type n values are as in Fig. 2; *vangl2*-injected wild type n=50 cells, 9 embryos. (D) Representative ectodermal cell expressing memGFP over three time points from time-lapse data. (E,F) Quantitation of the average total number of protrusions and the total percentage of polarized protrusions in wild type (n values are as in Figs 2 and 3) and *vangl2*-injected wild-type embryos (n=10 cells, 7 embryos). (G) Directed migration values (wild type n values are as in Fig. 3; *vangl2*-injected n=43 cells, 9 embryos). (H) Schematic representations of the migration paths of individual ectodermal cells. Origins (arrows) standardized for comparison. Dorsal is to the right. Average values are shown  $\pm$  standard deviation.  $**P<0.01$ ,  $****P<0.0001$ ; *P* values are versus wild type; two-tailed unpaired *t*-test. Scale bar, 5  $\mu$ m.

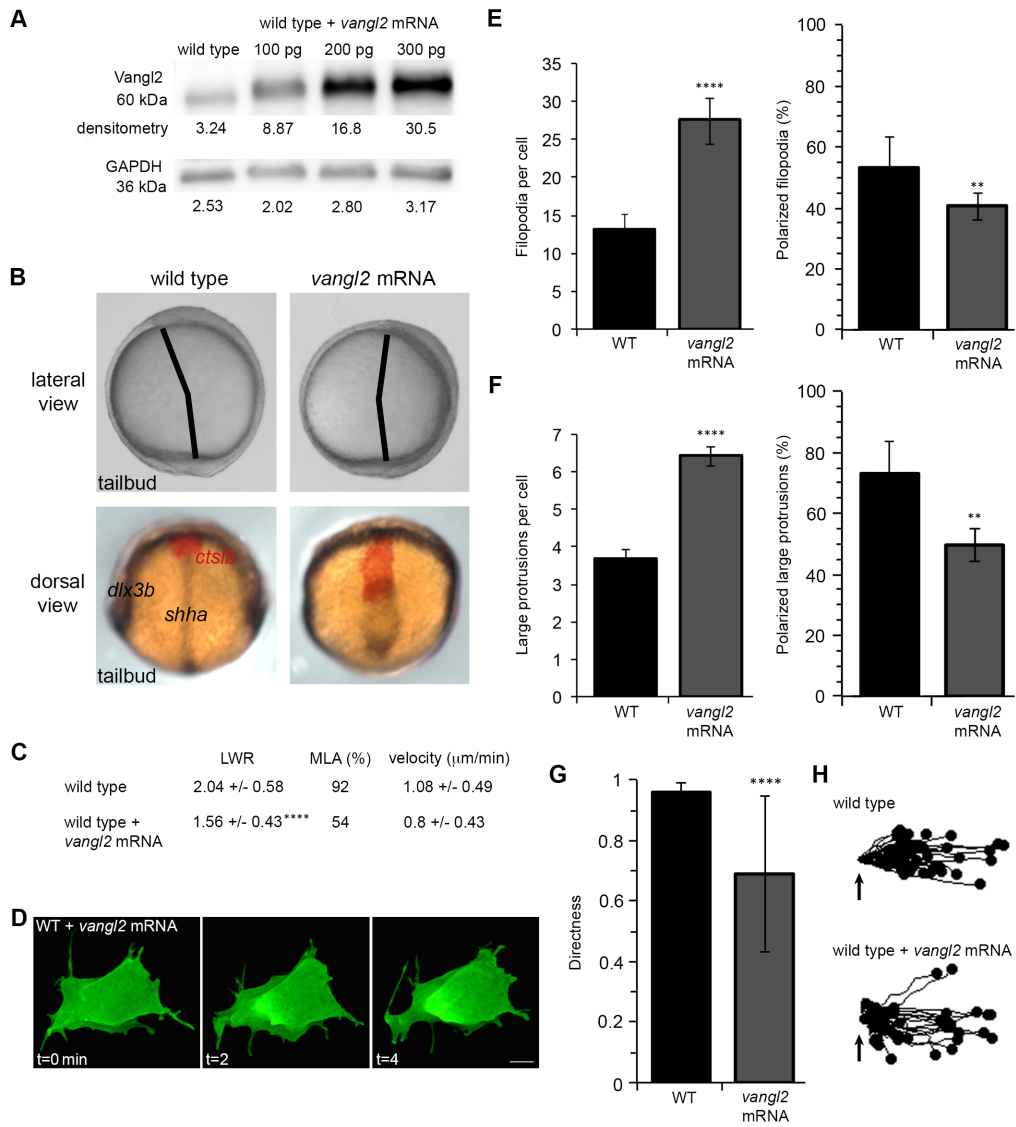

Figure S3

**Fig. S4. Vangl2 expression in polarized migrating gastrula cells.** (A) Tailbud-1-somite stage wild-type lateral ectodermal cells injected with memRFP and GFP-VANGL2 synthetic mRNA. (B,D) Plot profiles of fluorescence intensity (F.I.) across the anterior/posterior (B) and leading edge/trailing edge (D) axes of single ectodermal cells. (C,E) memRFP and GFP-VANGL2 anterior/posterior (C) and leading edge/trailing edge (E) membrane F.I. ratios for individual lateral ectodermal cells (anterior/posterior n=18 cells, 15 embryos; leading edge/trailing edge n=20 cells, 15 embryos). Horizontal and vertical red and green lines indicate averages. n.s. not significant; two-tailed paired *t*-test. Scale bars, 5  $\mu$ m.

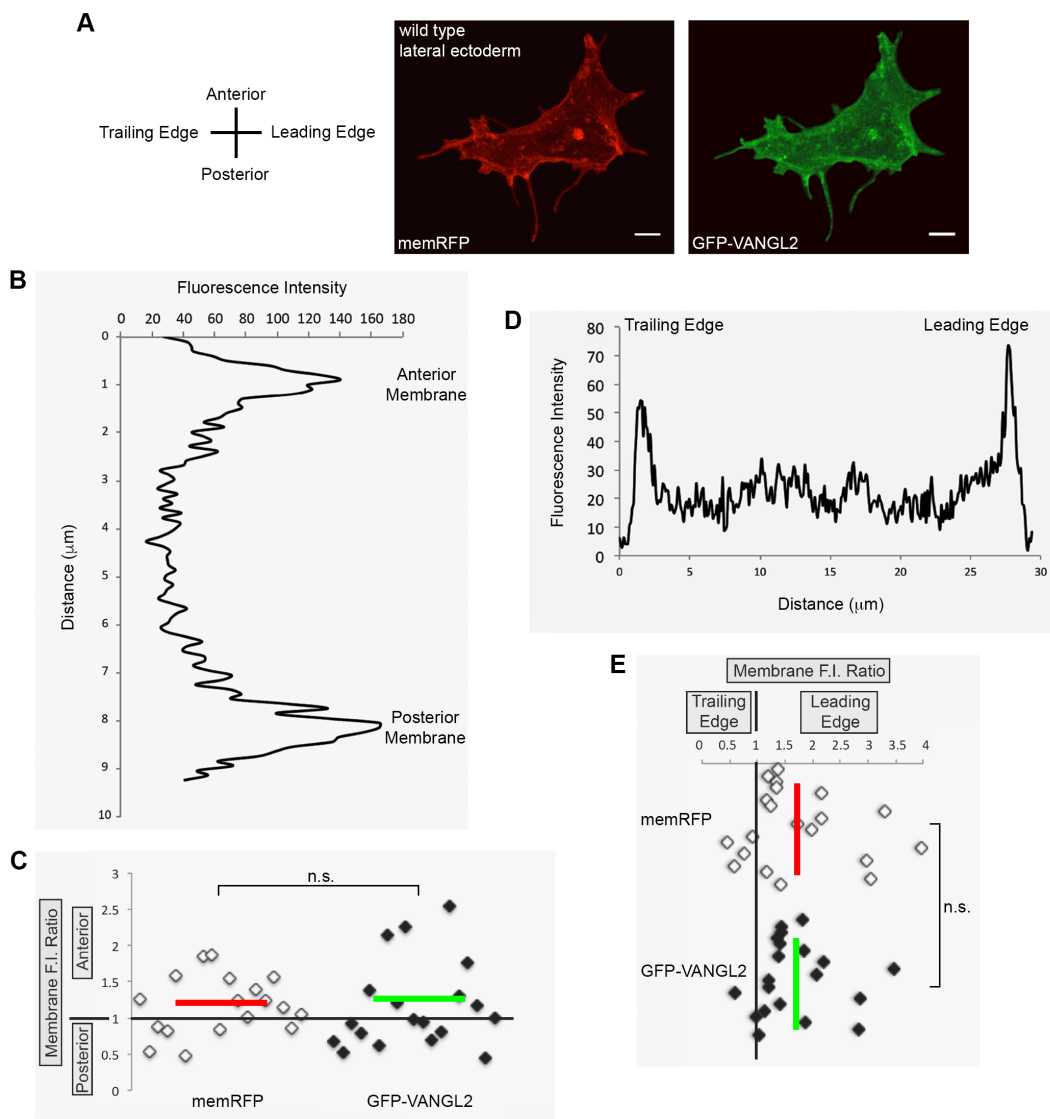

**Fig. S5. GFP-VANGL2 localization in protrusive and non-protrusive membrane domains.** (A) Lateral ectodermal cell labeled with memRFP and GFP-VANGL2. Arrows denote a forming non-polarized large protrusion. Arrowheads show a non-protrusive membrane domain. memRFP and GFP-VANGL2 fluorescence intensity (F.I.) ratios for (B) protrusive/non-protrusive membrane domains (n=9 protrusions, 6 embryos) and (C) polarized/non-polarized large protrusions (n=14 protrusions, 5 embryos). Vertical red and green lines indicate the averages. \* $P < 0.05$ , n.s. not significant; two-tailed paired *t*-test. Scale bars, 5  $\mu\text{m}$ .

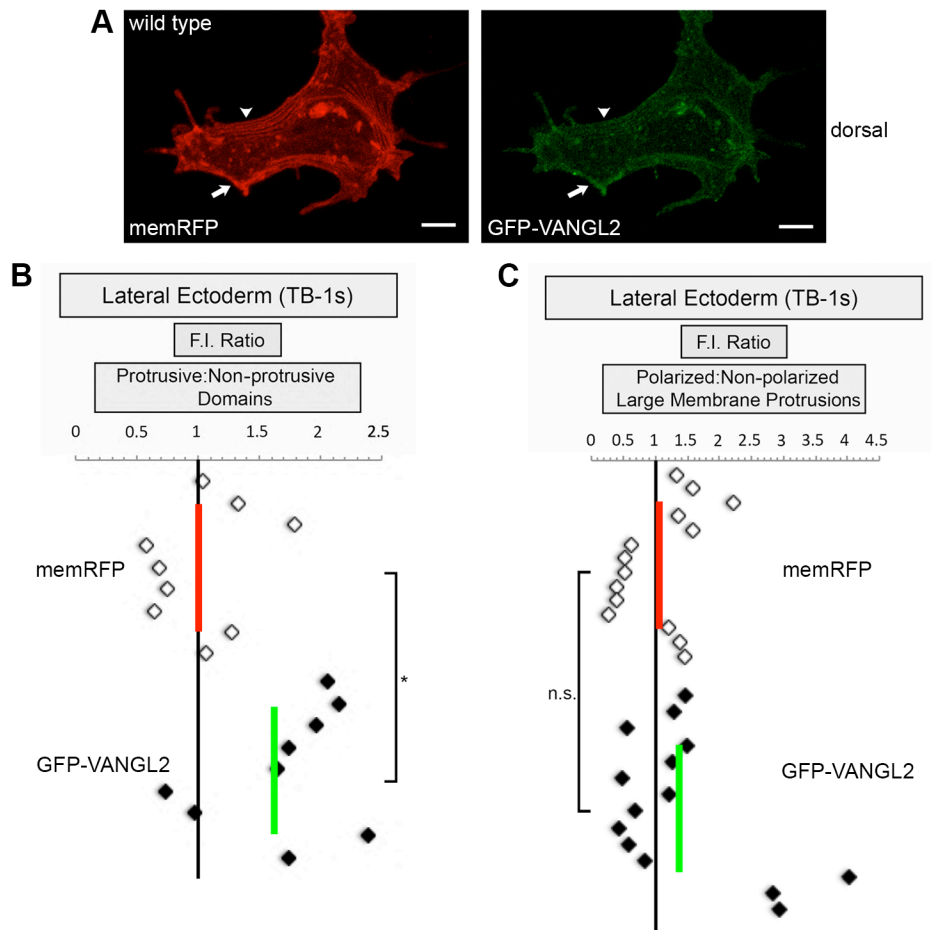

**Fig. S6. Morpholino knockdown disrupts fibronectin expression and fibrillogenesis.** (A) Immunofluorescence labeling of fibronectin expression in tailbud stage wild-type embryo and wild-type embryos injected with either 5 ng or 10 ng of each *fibronectin* morpholino (MO). (B) Injection of *fn1a/1b* synthetic mRNA rescues the *fn1a/1b* morpholino ECM phenotype. Bottom images in (A) and (B) show DAPI-labeled nuclei. Scale bars, 5  $\mu$ m.

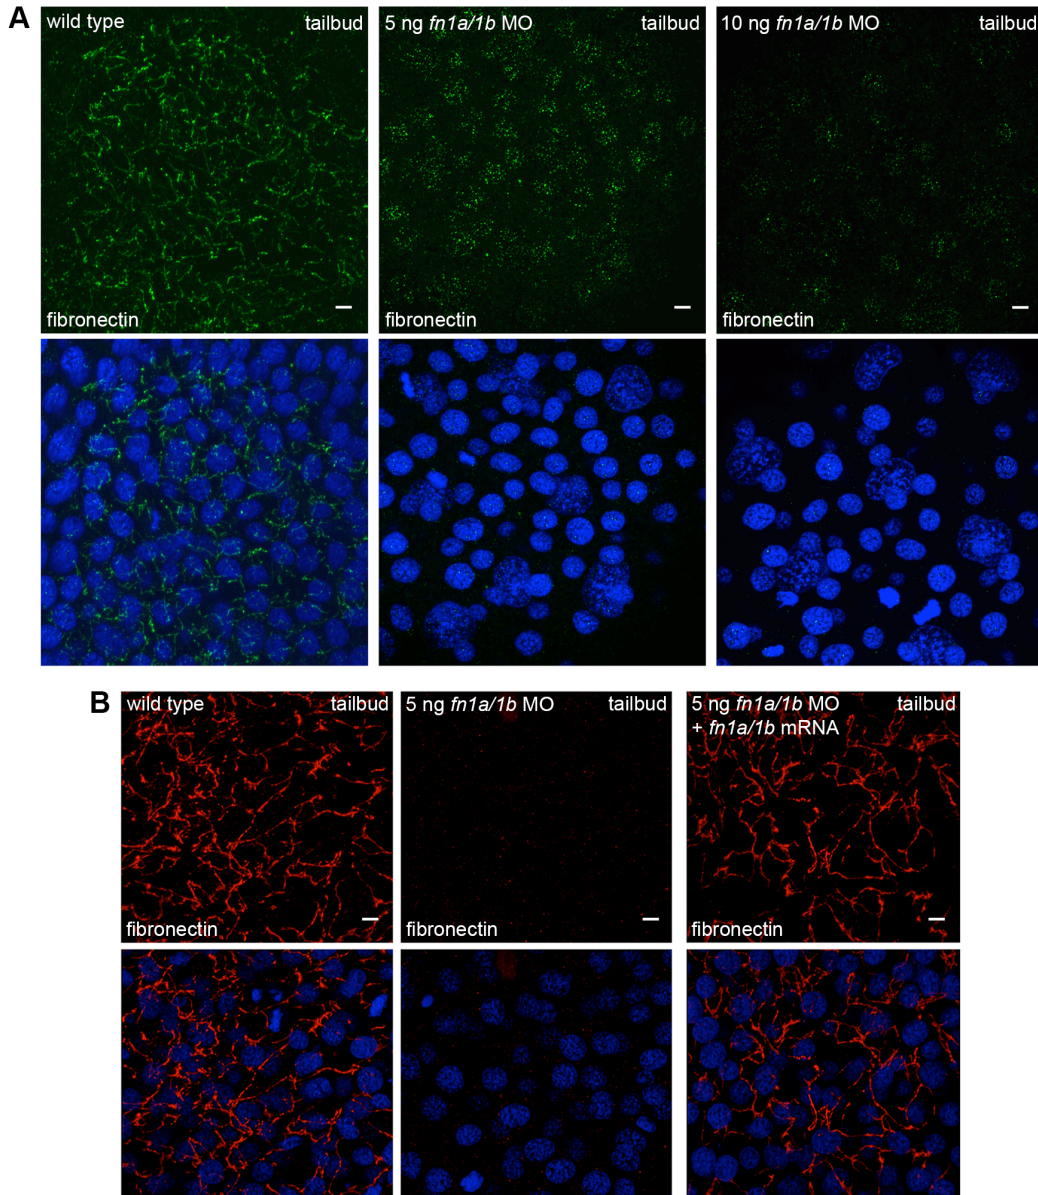

**Fig. S7. Wild type and *vangl2* morphant membrane protrusive activity at mid-gastrulation.** (A) Time-lapse confocal images of 80% epiboly epiblast cells expressing memGFP. WT, wild type. (B,C) Quantitation of the total numbers of membrane protrusions formed by wild type (n=9 cells, 7 embryos) and wild-type embryos injected with *vangl2* morpholino (MO) (n=10 cells, 6 embryos). (D) Quantitation of the total percentage of polarized large protrusions. Average values are shown  $\pm$  standard deviation. **\*\*** $P < 0.01$ ;  $P$  values are versus wild type; two-tailed unpaired  $t$ -test. Scale bars, 5  $\mu$ m.

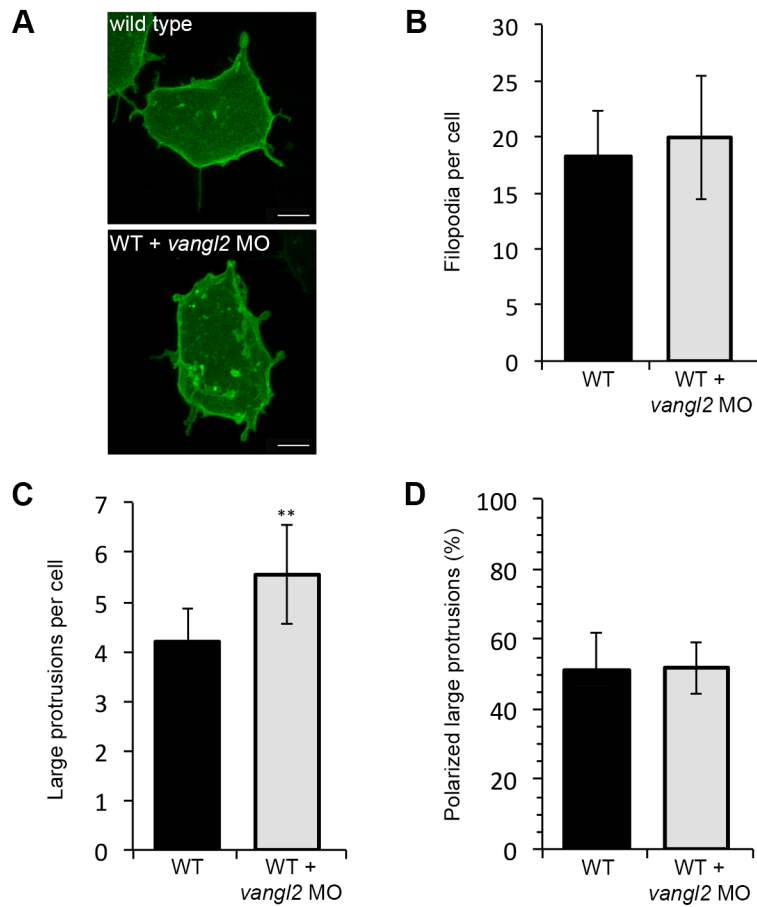



**Fig. S8. Fibronectin is not required for Vangl2 expression at 60% epiboly.** (A) Immunofluorescence labeling of Vangl2 protein expression in wild type and *fn1a/1b* morpholino (MO)-injected wild-type embryos without (left panels) and with (right panels) DAPI nuclear labeling. (B) Representative plot profiles showing the average fluorescence intensities across single epiblast cells in wild type (n=30 cells, 3 embryos) and *fn1a/1b* morphant embryos (n=30 cells, 3 embryos). Scale bars, 5  $\mu\text{m}$ .

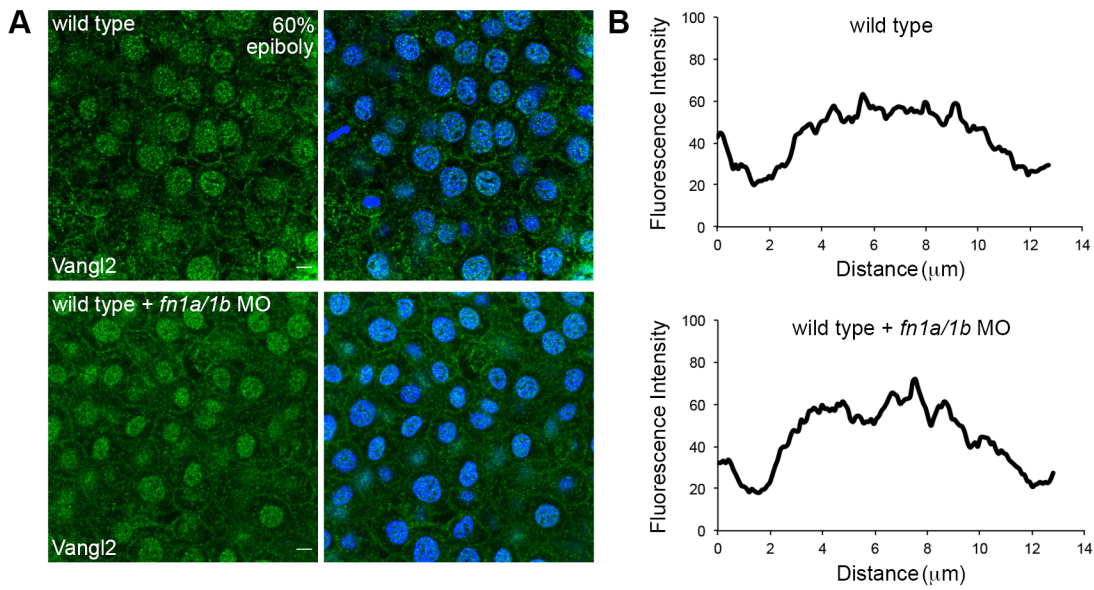

**Fig. S9. Western blot analysis of Vangl2 expression in *fibronectin* morphants.** Blots of total protein extracts from wild-type control embryos and wild-type embryos injected with 3, 6, 5, and 10 ng of each *fibronectin* morpholino (MO). Vangl2 labeled with a rabbit polyclonal antibody and actin loading control. Densitometry numbers for Vangl2 are normalized to actin.

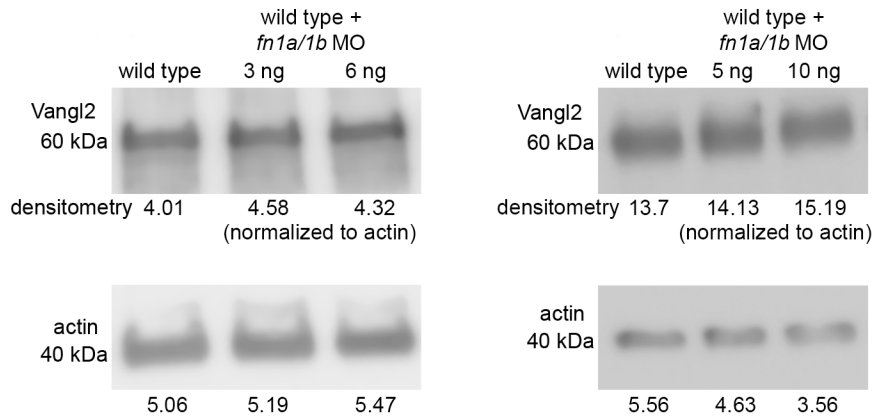

**Fig. S10. Knockdown of fibronectin in *vangl2* mutant embryos.** (A) Time-lapse confocal image of late gastrula stage cell expressing memGFP. *vangl2* mutant embryo injected with *fn1a/1b* morpholinos (MO). (B,C) Quantitation of the total numbers of membrane protrusions formed by *vangl2* mutant embryos injected with *fn1a/1b* MO (n=5 cells, 3 embryos). The data from wild type (WT), *vangl2* mutant embryos, and wild-type embryos injected with *fn1a/1b* MO are shown for comparison. (D) Quantitation of the total percentage of polarized large protrusions. Average values are shown  $\pm$  standard deviation. \*\*\*\* $P < 0.0001$ ;  $P$  values are versus wild type; one-way ANOVA significance test followed by Tukey HSD post-hoc tests. Scale bar, 5  $\mu$ m.

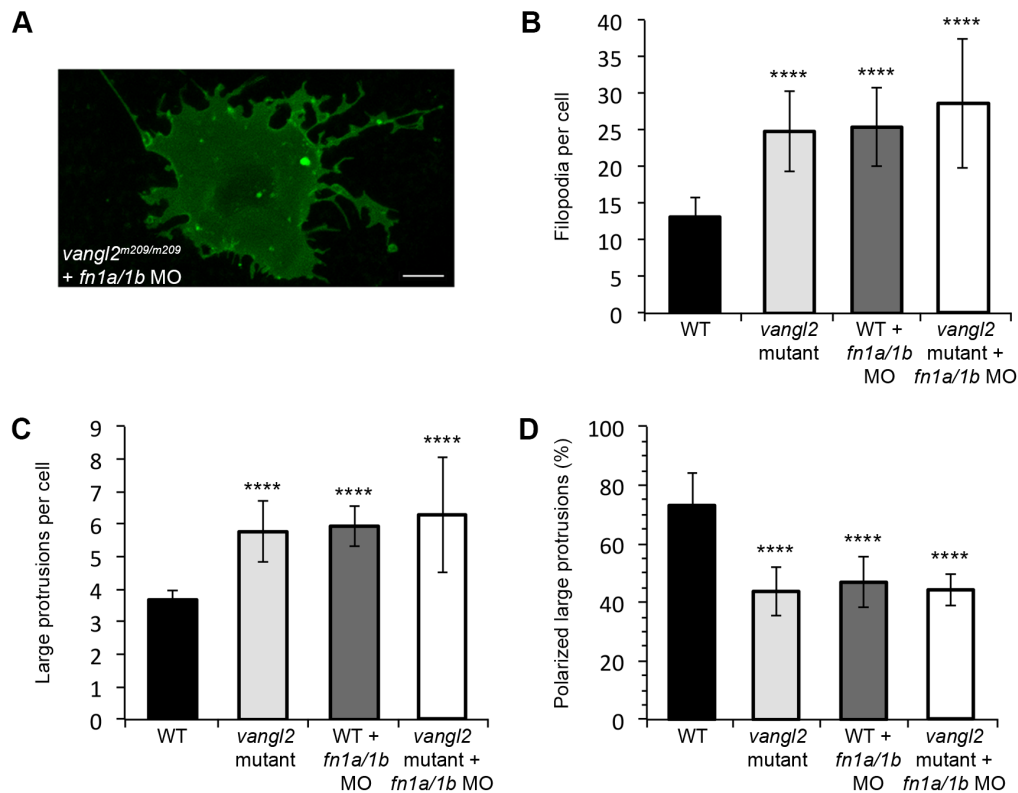

**Fig. S11. *vangl2* mRNA overexpression in *fn1a/1b* morphant wild-type embryos.** (A) Time-lapse confocal image of late gastrula cell expressing memGFP. *fn1a/1b* morpholino (MO) injected wild-type embryo co-injected with synthetic *vangl2* mRNA. (B,C) Quantitation of the total numbers of membrane protrusions formed by wild-type embryos injected with *fn1a/1b* MO and *vangl2* mRNA (n=5 cells, 4 embryos). The data from wild type (WT), *vangl2* mRNA injected wild-type embryos, and *fn1a/1b* MO injected wild-type embryos are shown for comparison. (D) Quantitation of the total percentage of polarized large protrusions. Average values are shown  $\pm$  standard deviation. \*\* $P < 0.01$ , \*\*\* $P < 0.001$ , \*\*\*\* $P < 0.0001$ ;  $P$  values are versus wild type; one-way ANOVA significance test followed by Tukey HSD post-hoc tests. Scale bar, 5  $\mu\text{m}$ .

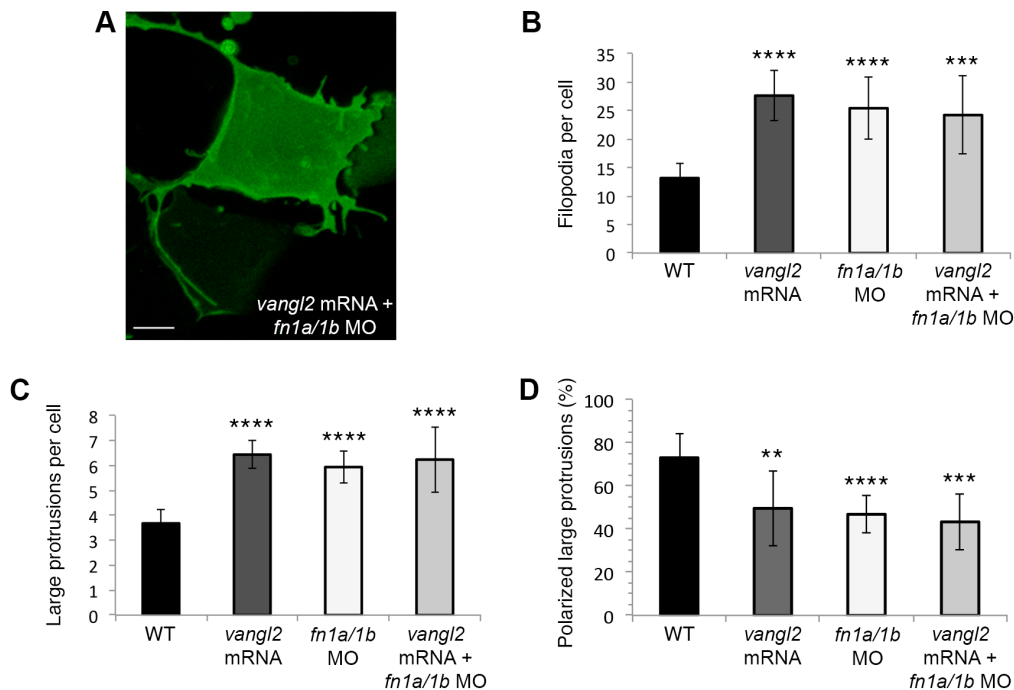

**Fig. S12. Injection of *fn1a/1b* mRNA fails to rescue the *vangl2* mutant embryo convergence and extension phenotype.** (A) Lateral view of a wild-type embryo at the yolk-plug closure (YPC)-tailbud stage. Black lines denote the polster-tailbud angle. (B) Lateral views of three *vangl2*<sup>m209/m209</sup> embryos highlighting subtle variations in the mutant convergence and extension phenotype. (C) Lateral views of three *vangl2*<sup>m209/m209</sup> embryos injected with *fn1a/1b* mRNA (n=50 mRNA injected homozygous mutant embryos analyzed).

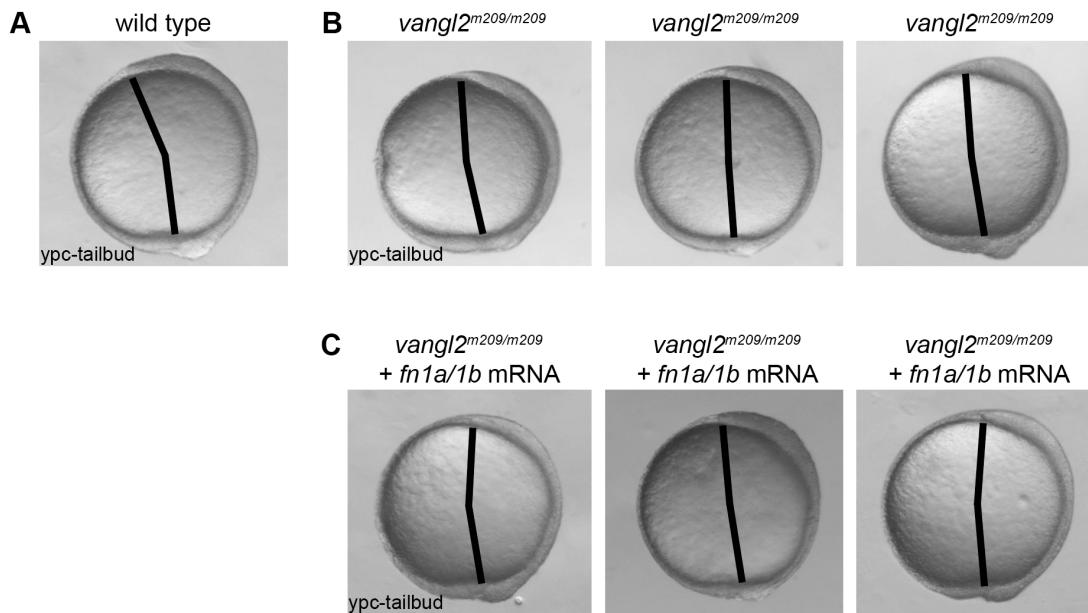

**Table S1.** Accumulated and Euclidean ectodermal cell translocation distances.

|                                                          | Accumulated distance ( $\mu\text{m}$ ) | Euclidean distance ( $\mu\text{m}$ ) |
|----------------------------------------------------------|----------------------------------------|--------------------------------------|
| wild type                                                | 19.49 +/- 8.82                         | 18.81 +/- 8.78                       |
| <i>vangl2</i> <sup>m209/m209</sup>                       | 17.68 +/- 9.70                         | 15.76 +/- 10.54                      |
| <i>glypican4</i> <sup>m119/m119</sup>                    | 21.22 +/- 5.05                         | 20.02 +/- 5.18                       |
| wild type + <i>vangl2</i> mRNA                           | 14.36 +/- 7.75                         | 11.45 +/- 9.06                       |
| wild type + <i>prickle1a</i> morpholino                  | 17.74 +/- 6.18                         | 15.68 +/- 8.04                       |
| wild type + <i>fn1a/1b</i> morpholino                    | 24.78 +/- 11.49                        | 22.88 +/- 11.26                      |
| <i>vangl2</i> <sup>m209/m209</sup> + <i>fn1a/1b</i> mRNA | 23.45 +/- 6.34                         | 22.03 +/- 6.15                       |
